# Supplementary material for: A classification algorithm for selective dynamical downscaling of precipitation extremes
Source: Copernicus journal article supplement (doi:10.5194/hess-2017-660), 2017-12-07
Supplement: Supplementary file [file hess-2017-660-RC2-supplement.pdf]

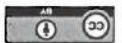

# A classification algorithm for selective dynamical downscaling of precipitation extremes

Edmund P. Meredith<sup>1</sup>, Henning W. Rust<sup>1</sup>, and Uwe Ullrich<sup>1</sup>

<sup>1</sup>Institut für Meteorologie, Freie Universität Berlin, Carl-Heinrich-Becker-Weg 6-10, D-12165 Berlin, Germany  
Correspondence to: Edmund P. Meredith (edmund.meredith@met.fu-berlin.de)

**Abstract.** High-resolution climate data [ $O(1\text{ km})$ ] at the catchment scale can be of great value to both hydrological modelers and end users, in particular for the study of extreme precipitation. Despite the well-known advantages of dynamical downscaling for producing quality high-resolution data, the added value of dynamically downscaling to  $O(1\text{ km})$  resolutions can often not be realised due to the prohibitive computational expense. Here we present a novel and flexible classification algorithm for discriminating between days with an elevated potential for extreme precipitation over a catchment and days without, so that dynamical downscaling to convection-permitting resolution can be selectively performed on high-risk days only, drastically reducing total computational expense compared to continuous simulations; the classification method can be applied to climate model data or reanalyses. Using observed precipitation and the corresponding synoptic-scale circulation patterns from reanalysis, characteristic external circulation patterns are identified for the catchment via a clustering algorithm. These external patterns serve as references against which days can be classified as potentially extreme, subject to additional tests of relevant meteorological variables in the vicinity of the catchment. Applying the classification algorithm to reanalysis, the set of potential extreme days (PEDs) contains well below 10% of all days, though includes essentially all extreme days; applying the algorithm to reanalysis-driven regional climate simulations over Europe ( $12\text{ km}$  resolution) shows similar performance and the subsequently dynamically downscaled simulations ( $2\text{ km}$  resolution) well reproduce the observed precipitation statistics of the PEDs from the training period. Additional tests on continuous  $12\text{-}$  and  $2\text{ km}$  resolution historical and future (RCP8.5) climate simulations show the algorithm again reducing the number of days to simulate by over 90% and performing consistently across climate regimes. The downscaling framework we propose represents a computationally inexpensive means of producing high-resolution climate data, focused on extreme precipitation, at the catchment scale, while still retaining the advantages of the physically-based dynamical downscaling approach.

## 20 1 Introduction

Hydrological modelers and regional decision-makers benefit greatly from high spatial [ $O(1\text{ km})$ ] and temporal resolution climate data to both drive their catchment-scale hydrological models and design regional planning strategies. These are necessary as standard resolution model data [ $O(10\text{-}100\text{ km})$ ] suffer from many deficiencies, most noticeably both “averaging” and “scale-interaction” effects whereby (i) area averaging over large grid cell areas smooths-out fine-scale detail and (ii) feedbacks from small to large scales are not represented (Vołosjuk et al., 2015); these deleterious effects are amplified towards the tails of the

Targeted selection - not random  
Sampling in statistical sense. Useful  
for case studies and worst case scenarios.

but  
cate  
must be  
fallen to  
avoid  
misinterpret

distribution (Volosjuk et al., 2015). Despite their desirability, suitably high-resolution datasets are however rarely available, either due to insufficiently dense observational networks or the computational expenses associated with running climate models at such high spatial resolutions. To bridge this gap, both statistical and dynamical downscaling techniques have been developed for precipitation (Maraua et al., 2010) and other variables.

5 Statistical downscaling, in which statistical relationships between large-scales and local weather (i.e. observations) are developed, provides the computationally cheaper means of generating high-resolution climate data from coarse-resolution models. Such relationships can however only be developed in the presence of both appropriate local weather data (typically observations) and corresponding large-scale data (reanalysis or observational data), which are often unavailable at sub-daily and sub-hourly temporal resolutions and/or spatially too sparse. Issues with reference data aside, the lack of a physical basis behind standard statistical downscaling techniques can present other difficulties. Widely used univariate approaches do not capture physical and spatial dependencies and thus physical and spatial coherence between different meteorological variables may not be maintained after downscaling (Maraua et al., 2010), leading to combinations which are suboptimal as boundary conditions for hydrological modelling. Additionally, a statistical downscaling method which performs impressively in one region or season may not work as well in other seasons or regions (Volosjuk et al., 2017). Finally, and crucially, in the absence of a physical foundation there is no intrinsic reason why a statistical downscaling method which performs well in the present climate should also perform well in a future climate and thus if the coarse model has an incorrect climate change signal the statistical downscaling method will not apply any physically-based modifications to this (Maraua, 2016).

10 Dynamical downscaling with regional climate models (RCMs) provides a physically-based, though computationally more expensive, alternative to the statistical approach, crucially maintaining the physical coherence between different meteorological variables as far as the relevant processes are represented in the model. High-resolution RCMs (~10 km) add significant value to coarser general circulation models (GCMs) for multiple variables (Feser et al., 2011). This added value (AV) is primarily achieved through better representation of surface forcings and mesoscale processes, and is thus most evident in the presence of complex topography (Heikkilä et al., 2011; Torma et al., 2015) or strong land-sea contrasts (Feser et al., 2011). Precipitation, due to its high spatial and temporal variability, is perhaps the variable for which high-resolution RCMs exhibit the most AV. The strongest manifestations of AV for precipitation are found at short temporal scales, in the warm season, and in regions of complex topography regardless of temporal scale and season (Di Luca et al., 2012); AV is most evident for the extremes of the driving GCM due to more processes being represented (Torma et al., 2015). *Not so sure about this! Higher resolution ≠ AV*

20 Despite their relatively high resolution, typical RCMs [ $O(10\text{ km})$ ] still cannot resolve many precipitation-causing processes such as convection, which must instead be parameterized. As a result, models with parameterized convection tend to misrepresent heavy precipitation events, causing them to be too temporally persistent, too spatially widespread and locally not intense enough (Kendon et al., 2012); further issues are too much drizzle (Boberg et al., 2009) and a temporally displaced diurnal convective cycle (Hohenegger et al., 2008). Increasing horizontal resolution below about 4 km, convection-permitting models (CPMs) can explicitly simulate convective processes and improve on many of these shortcomings (Prein et al., 2015). The explicit representation of convective dynamics in CPMs produces more realistic convective features (Weisman et al., 2008),

Many ways of GSD - can be defined by specific criteria

Define! context and the parameters  
 RCMs  
 GCMs  
 for  
 good  
 Some  
 The  
 always  
 Not  
 always  
 could also  
 be other  
 compared

Not  
 RCMs &  
 GCMs  
 increasing  
 which  
 do!

To identify for dynamical downscaling days with an increased likelihood of extreme precipitation – “potential extreme days” (PBDs) – over the region of interest, we develop a two-step classification method based on (1) the synoptic-scale circulation pattern and (2) local-scale (modelled) meteorological indicators in the coarser-resolution parent model. This requires the identification of synoptic-scale circulation patterns which typically accompany extreme precipitation events in our catchment and the careful selection of meteorological parameters which, when in the vicinity of the catchment a defined threshold is exceeded, are conducive to the development of intense precipitation.

## 2 Methodology and Data

more accurate local precipitation intensities (Lean et al., 2008), and an improved representation of the diurnal convective cycle (Prein et al., 2013). With respect to the accuracy of precipitation totals, the main AV of CPMs can be expected to be found in area averages over, for example, a river catchment (Roberts, 2008). Importantly, the AV of CPMs is not restricted to improved present-climate precipitation statistics (e.g. Ban et al., 2014), but also extends to the climate change signal. Recent studies show that sub-daily convective extremes in CPMs exhibit an amplified response to enhanced boundary forcings compared to that found in coarser models with parameterized convection (Kendon et al., 2014), which can be highly non-linear (Meredith et al., 2015). The explicit simulation of physical process chains in CPMs, which can be highly-localized, gives more confidence in their projections than those derived from methods lacking in such a foundation or using parameterizations.

Of the current state-of-the-art options, CPMs provide the most reliable means of downscaling coarse-model output to the high spatial-resolution climate data (with fine-scale variability) needed by hydrologists and end-users, particularly for the study of extremes. A serious constraint on CPMs, however, is the considerable computational expense incurred when carrying out convection-permitting simulations on multi-year timescales, making them an infeasible option for many. For users interested in studying the impact of heavy or extreme precipitation events on their catchment, at least 90% of the days in any continuous simulation will be of little interest and could be viewed as wasted computational time. In an ideal procedure, dynamically downscaling to convection-permitting resolution might be skipped on these redundant days and only be carried out when there is a significant chance of the catchment experiencing extreme precipitation. Similarly, some users are more interested in assessing the catchment-scale impacts of a selection of physically-plausible extremes from a future climate, without being focused on precise probabilities derived from continuous CPM simulations (Hazeleger et al., 2015). The identification of which days to downscale, however, is a non-trivial task. Coarse model precipitation on its own is a poor predictor of extreme precipitation events in both observations and CPMs, especially in the summer, when precipitation extremes tend to be short-duration and of a convective nature (Fig. 1). *Not very easy to understand!*

With the aim of slashing computational time and expense, we develop a transferable methodology to discriminate between days with an increased likelihood of extreme precipitation – “potential extreme days” (PBDs) – and redundant days so that dynamical downscaling to convection-permitting resolution can be performed over a catchment only when a day has been identified as a PBD. In Sect. 2 we set out in detail our methodology and validation approach, with the following sections containing results, discussion and conclusions.

*This is context-dependent - level of sm numbers -*

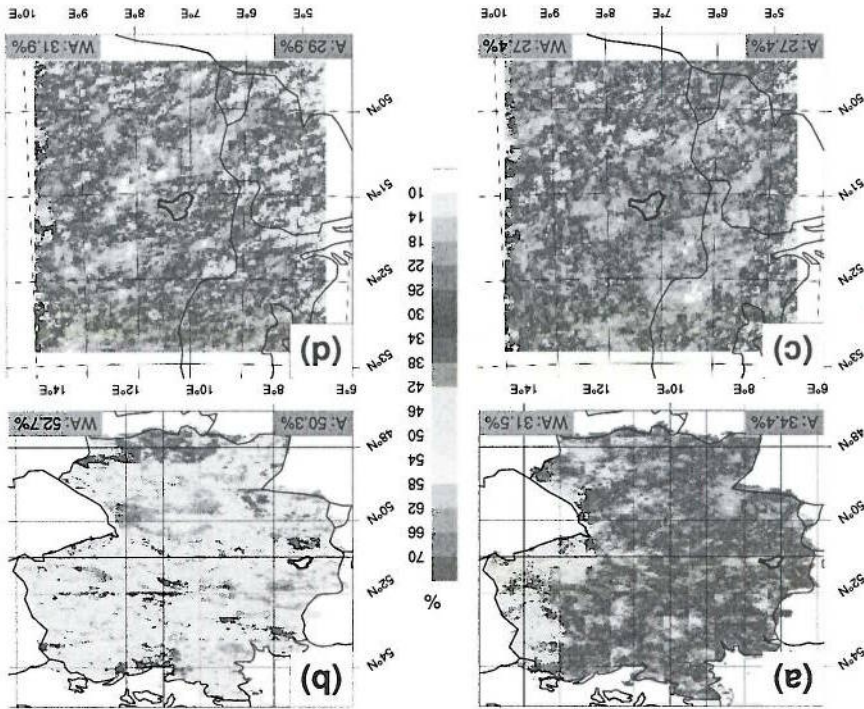

**Figure 1.** Coarse model extreme precipitation is a poor predictor of extreme precipitation in both observations and high-resolution simulations. (a) For summer extreme precipitation (1979-2015), the percentage of 99<sup>th</sup> percentile days in ERA-Interim (Dec et al., 2011) for which the corresponding day in observations (REGNIE; Rauthe et al., 2013) exceeds the observed 99<sup>th</sup> percentile. A value of 100% would mean that for all dates on which the 99<sup>th</sup> percentile was exceeded in the model, the observed 99<sup>th</sup> percentile was also exceeded in observations on the same date. (b) As in (a), except for winter (1980-2015). (c), (d) As in (a), except between the 0.11° and 0.02° simulations discussed in Sect. 2 for the (c) historical (1970-1999) and (d) RCP8.5 (2070-2099) periods. Values in the bottom-left of each panel show the area average over all data points, while values in the bottom right show area averages over the Wupper catchment in western Germany (marked; see also Sect. 2).

Our study catchment is that of the River Wupper in western Germany (Fig. 2). The Wupper catchment, home to some 950,000 inhabitants, has an area of 813 km<sup>2</sup>, contains about 2,300 km of streams and rivers, and drains into the River Rhine. The Wupper basin is vulnerable to winter flooding and summertime flash-flooding from mesoscale convective events; we thus focus on these two seasons.

## 5 2.1 Identification of synoptic-scale extremal circulation patterns

The REGNIE gridded daily precipitation dataset (Rauthe et al., 2013), with a spatial resolution of roughly 1 km, is used to compute separate time series of observed daily precipitation area-averaged over the Wupper catchment (Fig. 2) for each full

(cont.)

All or just wet days?

Different regions!

The extracted Z500 anomaly patterns next undergo a cluster analysis via the simulated annealing and diversified random-ization (SANDRA) method (Phillipp et al., 2007). SANDRA has been shown to overcome many of the limitations of standard k-means clustering algorithms, greatly reducing the role of stochastic effects in the final cluster partitions and thus providing clusters much closer to the "global optimum" (Phillipp et al., 2007). It is also less numerically costly than model-based clustering algorithms such as Gaussian mixture models (e.g. Rust et al., 2010). Relevant software for meteorological applications has been developed in the EU COST Action 733 (Phillipp et al., 2016), and we use this software in our study. Geopotential height is a standard variable for cluster analyses of atmospheric circulation patterns (e.g. Hidalgo-Munoz et al., 2011; Merino et al., 2016; Romero et al., 1999). Following Brigode et al. (2013), the spatial extent of the clustering domain is subjectively chosen such that the typical synoptic patterns associated with extreme precipitation in the Wupper catchment can be captured within the domain when present (Figs. 3-4), which is easily identifiable from historical extremes. Prior to the cluster analyses, outliers which would have little chance of being assigned to an appropriate cluster are removed from the datasets. Outliers are identified by computing, for each day, the Pearson pattern correlation of each Z500 anomaly pattern with that on all other extreme days; any day whose maximum pattern correlation (i.e. across all days) is more than two standard deviations below

seasonal means. averaged over the time steps 12, 18 and 00 UTC, i.e. the middle of the accumulation period, and are relative to their 1979-2015 period of 0730-0730 local time, that is 0530-0530 UTC in summer and 0630-0630 UTC in winter. Z500 anomalies are thus height (Z500) anomalies are extracted from the ERA-Interim reanalysis (Dee et al., 2011). REGNIE has an accumulation To identify the large-scale circulation patterns associated with these extreme days, the corresponding 500 hPa geopotential computed, and all days above P<sub>99d</sub> are defined as "extreme".

winter and summer in the period 1979-2015. From these time series the 99<sup>th</sup> precipitation percentiles of all days (P<sub>99d</sub>) are by this map is marked in the inner box of the top-left panels in Figs. 3 and 4. represents the regional orography as represented in the 0.02° CCLM model used in the simulations (see Sect. 2.3). The exact region covered Figure 2. The Wupper catchment (black outline) with main tributaries and lakes, and the River Rhine running north-northwestwards. Shading

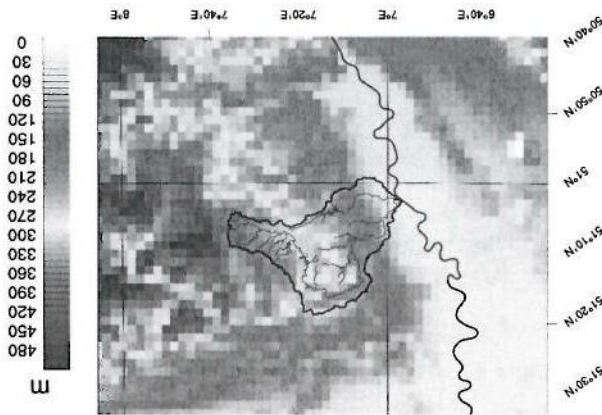

3-4 lines per year!  
Spatial period!  
inhomogen

?

All remaining days not rejected based on their  $p_{i,j}$  are next assessed in terms of relevant meteorological variables at the local scale, i.e. in the vicinity of the catchment. The choice of meteorological variable and the area around the catchment in which it is assessed are flexible. In general, they may depend on the catchment, season and variables available from the coarser parent model. For the Wupper catchment in summer (JJA) and winter (DJF) we select daily maxima (0600-0559 UTC) of relative humidity (700 hPa JJA, 300 hPa DJF) as an indicator of (near)-saturated air masses in the troposphere, 500 hPa horizontal divergence (JJA, DJF) as an indicator of tropospheric vertical ascent (of a frontal or convective nature), convective available potential energy (CAPE; JJA) as an indicator of atmospheric instability, and daily accumulated coarse-model precipitation (JJA, DJF). As with the Z500 data, variables are extracted from ERA-Interim on a Gaussian N128 grid ( $\sim 0.7^\circ$ ). To account for the transient nature of many extreme weather systems and the often low temporal resolution of reanalysis/model data (e.g. 6-hourly in the case of ERA-Interim), it is not only the nearest ERA-Interim grid cell to the catchment centre which is considered, but an entire  $7 \times 7$  cells around it ( $3 \times 3$  in the case of coarse-model precipitation). With the guiding aim of 'catching' the highest number of observed precipitation extremes (i.e.  $P \geq P_{99D}$ ) while excluding as many other days as possible, exceedance thresholds for each variable are empirically chosen, either as exceedances of a given percentile (divergence, CAPE, coarse-model precipitation) or as absolute values (relative humidity). The thresholds used for the Wupper catchment are summarized in Table 1. To account for different model climatologies, the absolute relative humidity values are transformed into multiples of the model's climatological mean prior to assessment.

2.2 Assessment of local-scale meteorological indicators

The resulting Z500 anomaly clusters and any outliers are considered as 'reference' external circulation patterns against which candidate days from a given dataset can be classified as PBDs, based on their similarity to these references. To this end, the area-weighted Pearson pattern correlation  $p_{i,j}$  (uncentred) between the Z500 anomaly fields of the candidate day  $i$  and the cluster centroid  $j$  is used; for our clustering domain (Figs. 3-4) this encompasses 1,935 data points (i.e. grid cells). A perfect  $p_{i,j}$  would have a value of 1. With the guiding aim of correctly classifying as many extreme days (i.e.  $P \geq P_{99D}$ ) and rejecting as many non-extreme days as possible, a  $p$  threshold ( $p_{i,j}$ ) is chosen for each cluster centroid  $j$  and days with a  $p_{i,j}$  below this threshold are rejected.  $p_{i,j}$  for each cluster is simply the minimum intra-cluster pattern correlation, reduced by 10% so that days with a  $p$  comparable to the lowest intra-cluster  $p$  are not rejected. To account for clusters with a particularly high  $p_{i,j}$  due to few members,  $p_{i,j}$  is capped at  $\frac{2}{3}$ .

datasets of meteorological variables. have genuine similarities, rather than simply the error-minimized 'least bad' cluster, as is typically the case in clustering large cluster member and its own cluster mean – is not less than 0.5. This way all days are assigned to a cluster with which they  $K$  is increased until the minimum intra-cluster pattern correlation – that is, the Z500-anomaly pattern correlation between each each of the winter and summer input data, leaving 31 and 33 days respectively. As a stability criterion, the number of clusters the sample mean of the same is excluded from the cluster analysis. In our case, this results in just one day being removed from

This clustering suggests that there are large-scale conditions on which the extreme precip. depends. Justification for ESD.

prediction  
in ESD

12

The additional downscaling step is performed using the same version of CCLM with a 221x221 grid cell domain centred on the Wupper catchment (Figs. 3-4), giving sufficient spatial spinup (Brisson et al., 2016a) upstream of the Wupper catchment.

(Ban et al., 2014; Fosser et al., 2015; Brisson et al., 2016b).  
 20 in reproducing precipitation statistics, particularly extreme statistics, over central Europe has been extensively documented (Denis et al., 2003). The enhanced performance of CCLM at convection-permitting resolution (relative to coarser resolutions) permitting resolution of 0.02° (~2.2 km) or rejected, the nesting ratio of 5.5:1 is in line with that recommended in the literature. All winter and summer days are then either classified as PEDs for further dynamical downscaling with CCLM to a convection-  
 15 regrid to a grid of similar spatial resolution to that used in the training stage, i.e. 0.7° and centred on the Wupper catchment. Z500 CCLM data are interpolated to the clustering domain and the selected meteorological variables are conservatively using identical model version and settings.

experiment (Kotlarski et al., 2014). Years 1979-1988 and 2009-2015 (up to 31.07.2015) were simulated by the present authors  
 10 oped by the CLM-Community. The years 1989-2008 were simulated by the CLM-Community as part of the EURO-CORDEX boundary forcing. CCLM is the community model of the German regional climate research community jointly further devel-  
 model COSMO-CLM (CCLM; Rockel et al., 2008) version 4.8, with ERA-Interim reanalysis (Dee et al., 2011) as lateral  
 CORDEX domain (Jacob et al., 2014) covering the period 1979-2015. Simulations were performed with the regional climate  
 been achieved, the method is applied identically to 0.11° (~12.2 km) evaluation simulations over the pan-European EURO-  
 days is, as discussed above, empirically determined on the basis of the ERA-Interim and REGNIE datasets. Once this has  
 5 The combination of variables, thresholds and clusters for detecting observed precipitation extremes and excluding non-extreme

2.3 Validation and simulation

identified for the Wupper catchment are presented in Sect. 3.1.  
 around the catchment. A schematic summarizes the full two-step selection algorithm (Algorithm 1). External patterns  
 In order to be classified as a PED, each threshold must be exceeded at any one of the grid cells (not necessarily the same

|                                 |                                        |                                        |               |       |
|---------------------------------|----------------------------------------|----------------------------------------|---------------|-------|
| Variable                        | Threshold DJF                          | Threshold JJA                          | Time method   | Cells |
| Horizontal divergence (500 hPa) | 90 <sup>th</sup> percentile            | 90 <sup>th</sup> percentile            | Daily Maximum | 7x7   |
| Relative humidity               | 97.5 % (300 hPa)                       | 86 % (700 hPa)                         | Daily Maximum | 7x7   |
| CAPE                            | n/a                                    | 90 <sup>th</sup> percentile            | Daily Maximum | 7x7   |
| Model Precipitation             | 95 <sup>th</sup> percentile (all days) | 95 <sup>th</sup> percentile (all days) | Daily sum     | 3x3   |

Table 1. Predictor variables, thresholds and region. Note that these thresholds are relative to the model's/reanalysis' own climatology, so that the absolute values of the anomalies/percentiles will vary depending on the model/reanalysis on which the classification algorithm is being applied. On the Gaussian N128 grid, one cell has a width of roughly 75 km.

To provide a sterner test of the method, we additionally perform two sets of continuous 30-season convection-permitting simulations over the Wupper catchment so that the method can also be assessed in reverse – of the actually simulated 0.02° extreme days ( $P \geq P_{99D}$ ), how many would have been identified as PEDs from the 0.11° coarse model?

## 2.4 Verification via continuous simulations

Lateral boundary conditions are updated 3-hourly and 50 unevenly spaced terrain-following vertical levels are used. For each identified PED, the 0.02° simulation is initialized at 1200 UTC the preceding day to allow abundant precipitation spin-up time; as little as 3-6 hours are typically sufficient in convection-permitting models though (Sun et al., 2012). PEDs on consecutive days are downscaled continuously to save resources. For validation, the precipitation statistics of the dynamically downscaled PEDs from the CCLM evaluation runs are compared with those of the observed PEDs identified from ERA-Interim. Area averages of daily precipitation over the Wupper catchment are considered, using REGNIB and 0.02° model output. The evaluation and validation of the identified PEDs is presented in Sect. 3.2.

```

for j in (1,...,K) do
  if ( $p_{i,j} \geq p_j$ ) then
    if ( $RH700_i \geq RH700_{thresh}$ ) then
      if ( $DIV500_i \geq DIV500_{thresh}$ .OR. $CAPF_i \geq CAPF_{thresh}$ ) then
        if ( $P_i \geq P_{95D}$ ) then
          DAYi classified as PED
        end if
      end if
    end if
  end if
end for

```

# Extremal patterns 1 to K  
# Synoptic-scale tests  
# Local-scale tests

For winter the algorithm is the same, except that CAPF is excluded and relative humidity is at 300 hPa.

$p_{i,j}$  is the Pearson pattern correlation between day  $i$  and extremal pattern  $j$ ,  $RH700$  is relative humidity at 700 hPa,  $DIV500$  is horizontal divergence at 500 hPa,  $CAPF$  is convective available potential energy,  $P$  is accumulated daily precipitation. (*i.e.*  $p$  thresholds) are determined as described in Sect. 2.1. If tests of local-scale meteorological variables are performed using the thresholds and grids described in Table 1. If *any* of the cells in the grid pass the test, then the next test is applied.

**Algorithm 1** Schematic of classification algorithm for identifying PEDs in summer. Example for a single day  $i$ .



The greater diversity of synoptic patterns which can lead to extreme precipitation in the Wupper catchment in summer, compared to winter, can be seen in the number of clusters  $K$  necessary before our stability criterion (see Sect. 2.1) is reached (Figs. 3-4). The higher  $K$  also hints at the in general more challenging nature of forecasting summertime intense precipitation, when synoptic forcing tends to be weaker and small-scale chaotic processes play an increased role. In winter (Fig. 3), precipitation extremes in the Wupper catchment are most often associated with a dipole-like structure characteristic of a strong positive phase of the North Atlantic Oscillation (Hurrell, 1995), with various shifts of the dipole centres (clusters 1-3). Such a synoptic pattern gives a strong zonal forcing, sweeping deep low-pressure systems and associated frontal precipitation across the catchment; similar clusters have previously been identified for north-eastern Switzerland (Gianakaki and Martius, 2016). For the remaining cluster (cluster 4) and the outlier, shallower depressions become embedded in a relatively weak zonal flow, depositing their albeit less intense precipitation over a more prolonged period; these patterns account for less than one sixth of all extreme days ( $P \geq P_{99D}$ ) though. In summer, a dipole-like pattern can also be seen on some extreme days (cluster 1), though accounting for just over one seventh of all extremes; such events in summer can also be expected to include enhanced frontal convection. The remainder of the summertime extremes are associated with a weaker zonal forcing. High pressure over eastern Europe often advects warm, moist air from the Mediterranean into central Europe (clusters 2 and 4), enhancing instability and increasing the chance of deep convection; Bardsosy (2010) also identified such a pattern as bringing intense precipitation to south-west Germany during summer. Another common pattern is that of a front, often with a small embedded low, extending across the

### 3.1 Extremal circulation patterns for the Wupper catchment

## 3 Results and Discussion

A different GCM – the Max Planck Institute's Earth System Model (MPI-ESM-LR) – at the start of the modelling chain provides a new challenge for the method from the previous ERA-Interim-driven simulations. The MPI-ESM-LR runs are continuous transient simulations performed as part of the CMIP5 project (Taylor et al., 2012), using observed greenhouse gas concentrations from 1949-2005 (historical) and representative concentration pathway 8.5 (RCP8.5; Van Vuuren et al., 2011) from 2006-2100. One MPI-ESM-LR member (1949-2100) has been continuously downscaled with CCLM over the EURO-CORDEX domain to 0.11° resolution by the CLM-Community (Keuler et al., 2016); model settings are as in the previously discussed ERA-Interim-driven evaluation runs, greenhouse gas concentrations excepted.

For the present study, we have dynamically downscaled the aforementioned 0.11° CCLM transient simulations to 0.02° over 30 summers from the historical and RCP8.5 periods, 1970-1999 and 2070-2099 respectively. The 0.02° model domain and setup are the same as in Sect. 2.3 (greenhouse gas concentrations aside); simulations are initialized in April and run until the end of August each year. Summertime extreme precipitation in the Wupper basin tends to be of a convective and more catchment-scale nature than its wintertime counterpart, with small-scale variability and chaotic processes playing an enhanced role in event intensity. In addition to this, potential differences in large-scale circulation found in a future climate pose an additional challenge for the classification algorithm. The choice of 30 summers, historical and future, is thus intended to ensure a robust testing of our method. The performance testing via continuous simulations is presented in Sect. 3.3.

number of PEDs are identified for dynamical downscaling to 0.02° (Table 2). The PEDs again represent well below 10 % of Applying the same methodology to the 0.11° CCLM evaluation runs (ERA-Interim driven) over the same period, a similar surprise.

10 a much smaller fraction in the PEDs than in the set of all days. Such a good performance in the training dataset is, however, no “redundant days” (i.e.  $P > P^{90D}$ ) falls from about 3,000 to 48 in winter and 126 in summer. The “redundant days” thus occupy classification algorithm to reduce the number of PEDs to well below 10 % of all days (Table 2). In the process, the number of While still capturing more-or-less all observed extreme days, the constraints derived from ERA-Interim variables enable the

### 3.2 Evaluation and validation of identified PEDs

5 Austria.

the catchment. A not dissimilar pattern was also identified by Brigode et al. (2013) in their study of extreme precipitation in slow-moving surface lows to advect a persistent moisture stream, within which intense convective cells can develop, across mid-tropospheric cut-off lows (clusters 5-7) are the most common cause of summertime extremes in our catchment, allowing catchment (clusters 3 and 8) in the wake an eastward moving ridge and triggering frontal lifting as it passes. Quasi-stationary patterns. The grey box centred over western Germany is the 0.02° simulation domain (Sect. 2.3).

via the clustering algorithm, and one outlier; the zero-line is marked in black. White contours represent the accompanying sea level pressure, Figure 3. 500 hPa geopotential height anomalies (shading) of extremal circulation patterns identified for the Wupper catchment in winter,

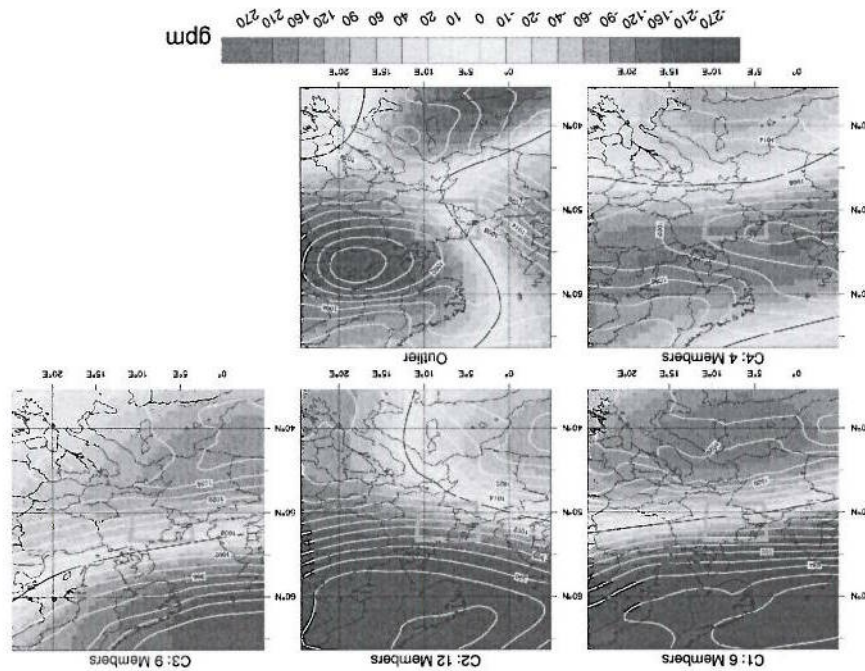

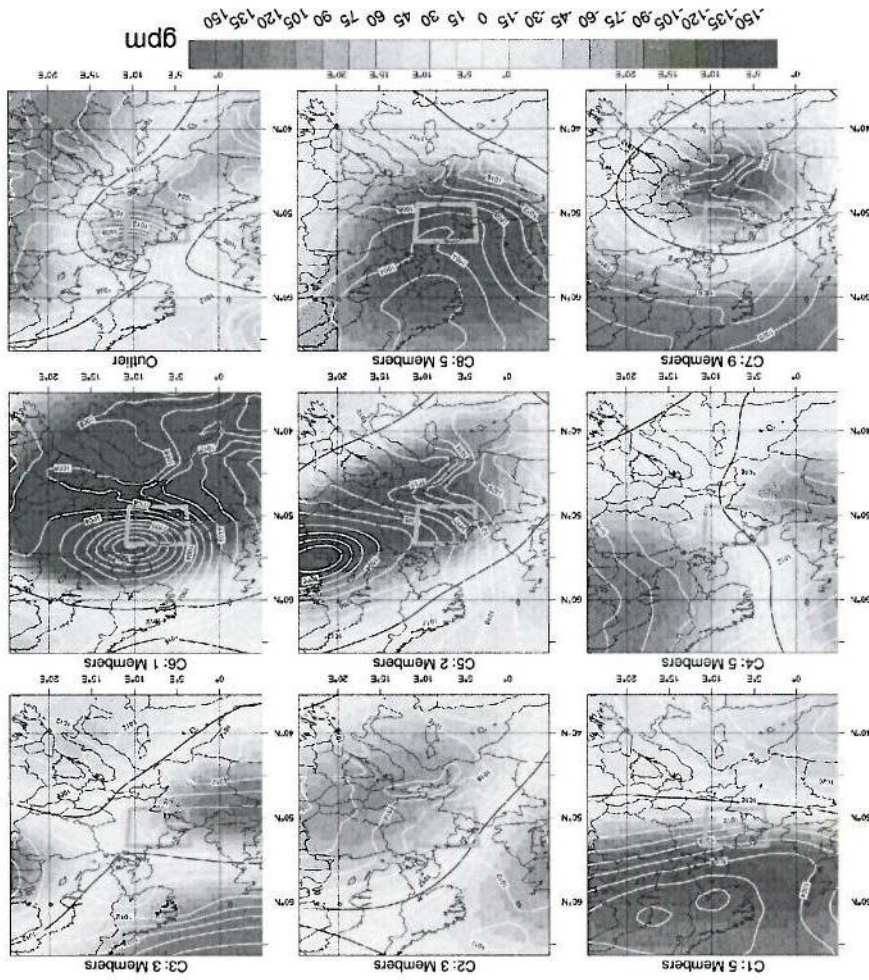

Figure 4. As in Figure 3, except for summer.

all days, slashing the computational expense against a continuous simulation of the whole period by an order of magnitude. Of note is that although the 0.11° CCLM simulations are forced at the lateral boundaries by ERA-Interim, only 123 of the 320 dates identified as PEDs in summer are also found amongst the ERA-Interim PEDs. This is attributable to the large internal variability that can be generated in RCMs of sufficiently large domain size (e.g. Lucas-Picher et al., 2008), which is often comparable to that found in GCMs (Christensen et al., 2001) and can cause the local RCM solution to significantly deviate from that of the parent GCM. The fraction of common days is higher in winter at 150/220, representing the typically smaller internal variability found in RCMs during winter (Giorgi and Bi, 2000) as stronger zonal forcing more rapidly sweeps small-scale perturbations out of the domain, thus limiting error growth.

*lateral solutions*

20 allowing of course for known model biases (e.g. Fosse et al., 2015). In the process, computational expense is reduced by over  
 reproduce the same range of precipitation events over the catchment as expected from the training dataset and observations,  
 downscaled PBDs shows that, with skilful classification of the PBDs, selective downscaling can be relied on to realistically  
 to the more small-scale and chaotic nature of convective precipitation. The good match between the ECDFs of observed and  
 though displaced to neighbouring regions of the 0.02° simulation domain (Fig. 6); this occurs most often in summer, owing  
 15 rain days counted over the Wupper catchment in the convection-permitting simulations do still feature heavy precipitation,  
 precipitation events, with dry days ( $P_D > 0.1$  mm) almost completely eliminated. Indeed, many of the seemingly dry to light-  
 those of the observed PBDs, for both seasons (Fig. 5, green curve); both ECDFs are again dominated by heavy to extreme  
 Dynamically downscaling all CCLM 0.11° PBDs to 0.02° produces ECDFs of daily precipitation which closely resemble  
 precipitation.  
 10 by heavy- to extreme-rain days – results from the classification algorithm's removal of days with a low potential for intense  
 more intense precipitation. The change in form of the ECDF – from one dominated by dry to light-rain days, to one dominated  
 2013). The form of the ECDF of the observed PBDs, however, is far removed from this as the probability is shifted towards  
 is known to well represent the bulk of the daily precipitation distribution, though perform less well for the tails (Rust et al.,  
 5 panel), the situation is less pronounced but the climatological (JJA) 90<sup>th</sup>/99<sup>th</sup> percentile is exceeded on about 60%/15% of the  
 (left panel) 90<sup>th</sup>/99<sup>th</sup> percentile is about 80%/20%, whereas in the set of all days it is only 10%/1%. For summer (right  
 randomly selected PBD becomes apparent (Fig. 5): in the set of PBDs, the probability of exceeding the climatological winter  
 days and PBDs from the training data set (ERA-Interim), the greatly increased probability of daily extreme precipitation on a  
 Comparing the empirical cumulative distribution functions (ECDFs) for catchment-averaged precipitation (observed) of all

single years?  
 general?

†Binds on 31.07.2015.

| Data / Experiment    | Time Period   | PBDs (# days) | P <sub>90</sub> captured (days/total days) | PBDs   All Days (days/total days)     |
|----------------------|---------------|---------------|--------------------------------------------|---------------------------------------|
| ERA-Interim          | DJF 1980-2015 | 6.8% (222)    | 100% (32/32)                               | 22.5%   90.0% (50/222   2,924/3,249)  |
| ERA-Interim          | JJA 1979-2015 | 8.6% (290)    | 97% (33/34)                                | 44.1%   90.0% (128/290   3,036/3,373) |
| CCLM-0.11° CORDEX-EU | DJF 1980-2015 | 6.8% (220)    | n/a                                        | n/a                                   |
| ERA-Interim driven   | (3,249)       | (220)         | n/a                                        | n/a                                   |
| CCLM-0.11° CORDEX-EU | JJA 1979-2015 | 9.8% (331)    | n/a                                        | n/a                                   |
| ERA-Interim driven   | (3,373)†      | (331)         | n/a                                        | n/a                                   |

Table 2. Summary table of performance of classification algorithm for training period (ERA-Interim) and CCLM evaluation runs. "Redundant days" are defined as days with precipitation below the 90<sup>th</sup> percentile of daily precipitation (all days).

Applying the classification algorithm, identically as in Sect. 3.2, to the 0.11° historical and RCP8.5 simulations again yields 10 selections of PEDs representing less than 10 % of the total days (Table 3). Amongst these PEDs, at least 75 % of 0.02°-simulation extreme days are captured in both time slices. In the case of the historical simulations, the fraction of redundant days (i.e.  $P > P_{90D}$ ) climbs by almost six percentage points relative to the training data set; for the RCP8.5 simulations, the fraction falls marginally. The former increase may simply be an artefact of the fewer summers (30 vs. 37) present in this testing data set. The similarity of performance between the historical and future simulations is noteworthy, particularly in light of RCP8.5 2070-2099 representing the end of the most extreme RCP scenario. Projected changes in large-scale extratropical circulation can be considerable (e.g. Barnes and Poivani, 2013; Zappa et al., 2013), and are known to exert strong control on regional precipitation climatologies (Shepherd, 2014). In the case of the MPI-ESM-LR model used in this study, for example, a northward shift of the annual-mean jet in the Atlantic sector (Barnes and Poivani, 2013) and reduction in the frequency of both North Atlantic and Eurasian summertime anticyclonic blocking (Masato et al., 2013) are projected under the RCP8.5 scenario.

### 3.3 Performance testing on continuous simulations

The *continuous* dynamical-downscaling of two sets of 30 summers – historical (1970-1999) and RCP8.5 (2070-2099) – from 0.11° to 0.02° provides an additional set of tests for the classification algorithm, namely: what fraction of the actually simulated extreme days in the 0.02° model would have identified as PEDs from the 0.11° model? In addition, is classification performance degraded in a future climate? The summer season is chosen to ask these questions due to the greater challenges in predicting summertime intense precipitation (see Sect. 2.4, Sect. 3.1).

Figure 5. Empirical cumulative distribution functions of daily precipitation for all days (red, observed), PEDs (blue, observed), and CCLM PEDs (green, downscaled to 0.02°). (a) Winter 1980-2015, (b) summer 1979-2015 (up to 31.07.2015). All values are area averages over the Wupper catchment. Vertical red lines mark important percentiles of the all-day distribution.

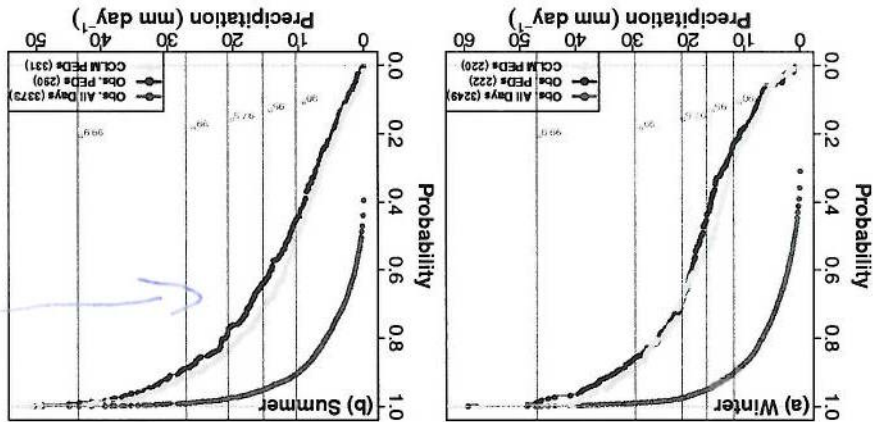

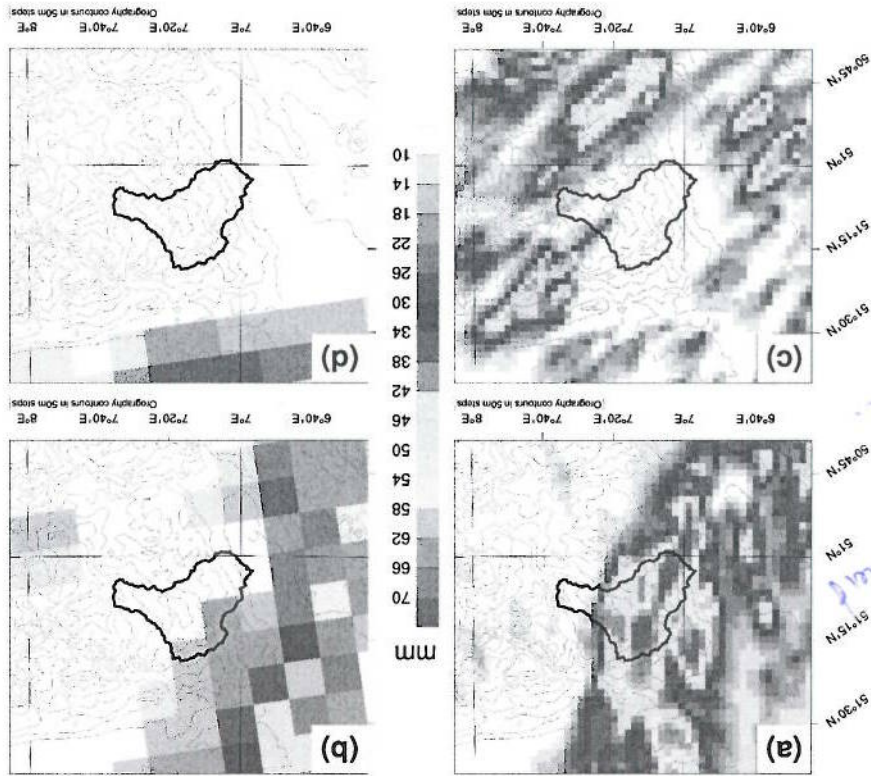

Figure 6. Illustrative modelled PEDs. (a) Example summer PED downscaled to  $0.02^\circ$  and (b) the same day in the  $0.11^\circ$  model. In this example, the strongest precipitation directly strikes the catchment in the  $0.02^\circ$  CCLM despite missing the catchment in the parent  $0.11^\circ$  CCLM. (c) Example summer PED with highly localised intense precipitation which falls outside the catchment in the  $0.02^\circ$  CCLM. (d) The corresponding day in the  $0.11^\circ$  CCLM.

Despite this, the classification algorithm performs more-or-less the same in historical and future climates. This, incidentally, adds credence to the approach used in conditional event attribution (Trenberth et al., 2015). While the classification algorithm unsurprisingly fails to capture all extreme days in either the historical or RCP8.5 simulations, the fact that the performance is the same across both climates indicates the added value of employing a physically-based downscaling methodology, allowing more robust conclusions to be drawn from the output. Of the extreme days which are not captured, 6 out of 7 (historical) and 4 out of 5 (RCP8.5) are lost due to their circulation patterns not well matching any of the pre-defined external clusters. This could indicate that the training period for identifying the external patterns is too short to encompass sufficient diversity or, more likely, that the GCM in question (MPI-ESM-LR) doesn't adequately represent the frequency and/or persistence of the large-scale circulation patterns which lead to observed extremes in our catchment. For example, CMIP5 GCMs are known to underestimate the frequency of Eurasian blocking (Masato et al., 2013) and GCMs in general often underestimate the persistence of blocking systems (e.g. Matsueda, 2011); the poleward flank of such blocking anticyclones often transports warm

moist air into central Europe enabling intense convective precipitation (see Sect. 3.1). In the case of MPI-ESM-LR during summer, a southward bias in the storm-track axis and over-active North Atlantic blocking are also evident in the CMIP5 historical simulations (Masato et al., 2013).

The similar performance of the classification algorithm across climates, as well as the evaluation period, is confirmed by looking at the historical and RCP8.5 ECDs (Fig. 7). As in the training dataset, the ECDs of the PBDs are shifted towards more intense precipitation compared to the ECDs for the sets of all days. For the PBDs, the probability of exceeding the respective climatological (JA) 90<sup>th</sup>/99<sup>th</sup> percentile in the historical and RCP8.5 simulations is similar to that found in the training dataset and the dynamically downscaled PBDs of the evaluation period, roughly 55%/10% (as compared to 10%/1% for all days), and the ECDs are dominated by heavy to extreme events with dry days almost absent. To quantify differences in the distributions of precipitation events amongst all days and the PBDs for discrete intensity ranges, we compute the relative likelihoods ( $R$ ) of finding a precipitation event within a given intensity range for the historical and RCP8.5 simulations (Fig. 8); this is simply the ratio of the respective probabilities, e.g.  $P(E|PBD) : P(E)$ , with the smaller of the two probabilities used as the denominator for plotting purposes.

The greatest difference between all days and the PBDs is found in the relative likelihoods of a randomly sampled day being dry, which is an order-of-magnitude lower in the PBDs. Indeed, considering the set of non-PBDs, the probability density function exhibits an even higher density of dry days than found for all days (not shown). Focusing on just wet-day percentiles, a regime shift from a higher  $R$  for all days to a higher  $R$  for PBDs occurs above the median wet day event. The higher  $R$  for the PBDs grows further as event intensity nears the most extreme precipitation events, consistent across historical and RCP8.5 experiments and approaching a factor of 10 in places (Fig. 8). For the most extreme events ( $P_D \geq P^{w99}$ ), more variability between historical and RCP8.5  $R$ -values emerges as the number of days involved limits towards zero. Future changes in the fraction of wet-days, and the sensitivity of wet-day percentiles to such changes (Schär et al., 2016), likely contributes to some of the small differences in relative likelihood between the historical and RCP8.5 experiments.

| Data / Experiment                             | Time Period<br>(# days)  | PBDs<br>(# days) | $P_{90}^{\text{nd}}$ captured<br>(days/total days) | Redundant days<br>PBDs   All Days<br>(days/total days) |
|-----------------------------------------------|--------------------------|------------------|----------------------------------------------------|--------------------------------------------------------|
| MPI-ESM-LR/CCLM-0.11°<br>CORDEX-EU/Historical | JJA 1970-1999<br>(2,760) | 9.8 %<br>(271)   | 75 %<br>(21/28)                                    | 49.8 %   90.0 %<br>(135/271   2,484/2,760)             |
| MPI-ESM-LR/CCLM-0.11°<br>CORDEX-EU/RCP8.5     | JJA 2070-2099<br>(2,760) | 9.5 %<br>(261)   | 82 %<br>(23/28)                                    | 42.9 %   90.0 %<br>(112/261   2,484/2,760)             |

**Table 3.** Summary table of performance of classification algorithm for 0.11° CCLM historical and RCP8.5 simulations, continuously down-scaled to 0.02° over 30 summers. “Redundant days” are defined as days with precipitation below the 90<sup>th</sup> percentile of daily precipitation (all days).

Shows better  
and scenarios

The preconditioning of PEDs on known external circulation patterns does not just reduce the total number of days to dynamically downscale. Importantly, it also allows conclusions to be drawn about changes in catchment-relevant precipitation between two periods, e.g. present and future climates, for these circulation patterns. A classification method which does not *guarantee* the capture of all extreme days clearly cannot be used to draw overall conclusions about precipitation changes in a given catchment. Preconditioning on circulation types does, however, allow conclusions to be drawn about changes in specific classes of precipitation extreme (Fig. 9), e.g. as identified via the clustering methodology outlined in Sect. 2.1. For example, for a known external circulation pattern, will the likelihood that the accompanying precipitation exceeds some catchment-relevant threshold be higher or lower in the future? This approach is in a way analogous to the framework used in conditional event attribution (e.g. Trenberth et al., 2015; Pall et al., 2017), where the question is posed: for some observed circulation pattern, how is the event's intensity affected by known thermodynamic changes in the earth's climate system? A major advantage of such an approach is the relative robustness of projected thermodynamic changes in the climate system compared to projected dynamical changes (Shepherd, 2016). From a catchment-hydrology perspective, one could imagine this being particularly useful for catchments vulnerable to specific compound extremes, for example intense precipitation in an estuarine catchment compounded by a shoreward moving low-pressure system with strong onshore winds (e.g. Bevacqua et al., 2017). Beyond the external patterns identified from the training period, however, there remains the possibility that a future climate may also contain new external circulation patterns which were previously either not associated with extreme precipitation or simply not present at all. Such systematic effects could only be explored with continuous dynamical downscaling of the different climates.

### 3.4 Applications and Outlook

Figure 7. Empirical cumulative distribution functions of daily precipitation for all days (red) and PEDs (blue) downscaled to 0.02°. (a) Historical (1970-1999), (b) RCP8.5 (2070-2099). All values are area averages over the Wupper catchment. Vertical red lines mark important percentiles of the all-day distribution.

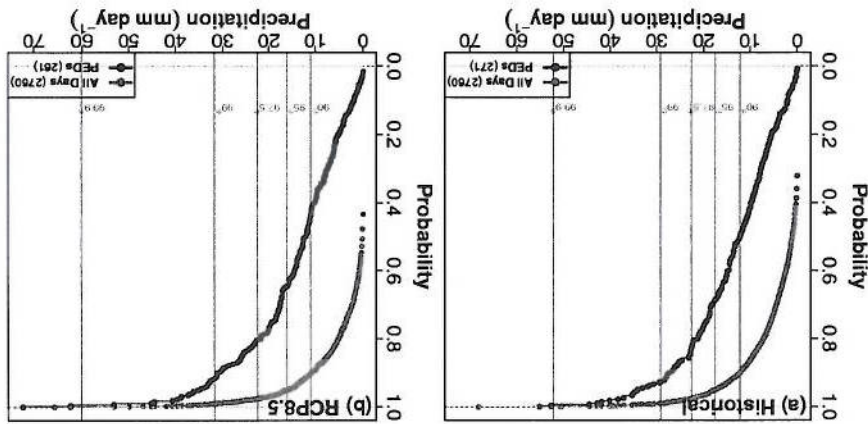



for reference.

Figure 9. Percentage change in daily precipitation intensity between the historical and RCP8.5 periods, conditional on extremal circulation pattern, from the 0.02° simulations. The numbers indicate the total number of PEDs for each pattern (i.e. cluster) in the historical (left) and RCP8.5 (right) periods, while vertical bars represent 90% confidence intervals. Clusters with less than 10 days in either period are excluded from the calculations. On the right hand side, the corresponding climate change signal for the 95<sup>th</sup> and 99<sup>th</sup> percentile of all days is provided

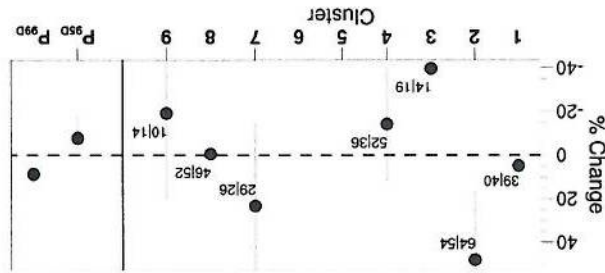

0.1 mm)

Figure 8. Relative likelihoods of precipitation on a randomly sampled day from all days and the PEDs being within a given intensity range for the (a) historical and (b) RCP8.5, 0.02° simulations. Note that precipitation intensities are based on the percentiles of wet days ( $P_D \geq$

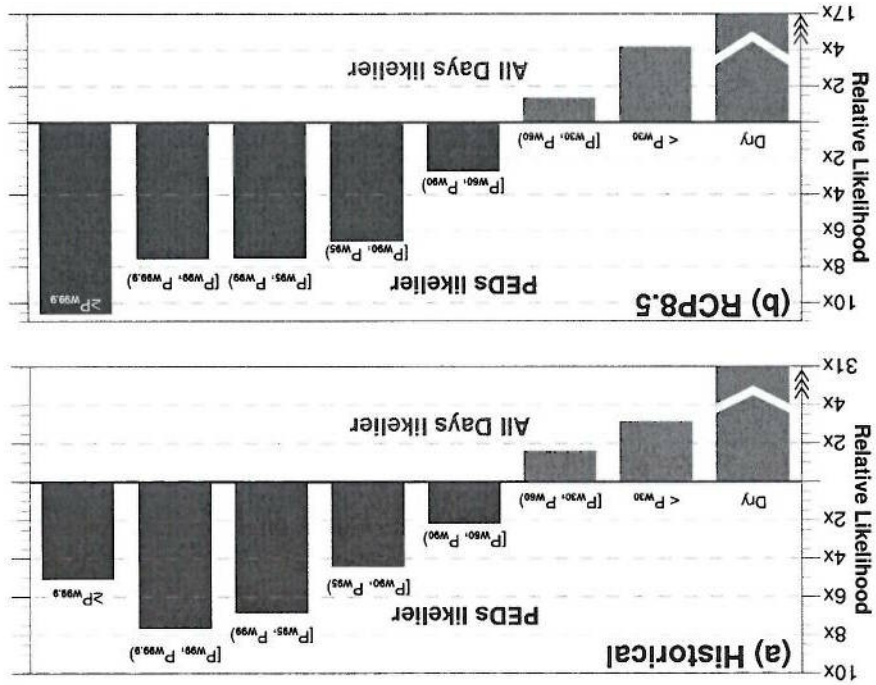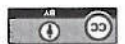

© Author(s) 2017. CC BY 4.0 License.  
 Discussion started: 7 December 2017

Hydrol. Earth Syst. Sci. Discuss., <https://doi.org/10.5194/hess-2017-660>  
 Manuscript under review for journal Hydrol. Earth Syst. Sci.

30  
25  
20  
15  
10  
5

Hydrological modelers, amongst others, benefit greatly from high-resolution climate data at the catchment scale – particularly for studying the impacts of extreme precipitation. In achieving these high resolutions [O(1 km)] while maintaining data quality, dynamical downscaling to convection-permitting resolution presents numerous advantages, though comes at an often prohibitive computational expense. To reduce the overall computational burden and instead dynamically downscale only those days for which there is an elevated likelihood of extreme precipitation in a catchment, we have developed a flexible and transferable classification algorithm for identifying PEDs and rejecting days unlikely to produce intense precipitation. While reducing computational expense by over 90%, the precipitation distribution of the training dataset's PEDs – in which more-or-less all extreme days were captured – can be well reproduced via convection-permitting dynamical downscaling, showing an ECDF dominated by strong to extreme precipitation events. Testing the classification algorithm on continuous datasets driven by a different global model, at least three quarters of the CPM's summertime extremes – which are intrinsically more challenging to identify than their wintertime counterparts – were caught and computational expenses were again slashed by over 90%.

The consistent performance of the classification scheme across historical and future climates further demonstrates its utility for studying changes in defined classes of precipitation extreme, for example those preconditioned on an identified external synoptic pattern which is known to severely affect a given catchment. In this regard, our method is complementary to current trends in how the projected impacts of climate change are communicated and adapted to end-user needs. Recent literature advocates the use of high-resolution weather models to create bespoke storylines of high-impact weather events for a given catchment in a future climate (Hazeleger et al., 2015). In the so-called ‘Tales’ approach of Hazeleger et al. (2015), the broad statistical terms in which climate change projections are typically communicated are replaced by high-resolution simulations of carefully selected past and future weather events over a given catchment in order to study the catchment-specific impacts of individual hydrometeorological events from past/future climates. This approach is designed to form part of a collaborative process in which end-users play a key role in selecting the type of events to be studied, providing vivid case-studies on which adaptation strategies can be decided (Hazeleger et al., 2015). Our methodology could be integrated seamlessly into this workflow. An additional advantage of this type of modelling framework is that anthropogenic factors extraneous to global climate change can easily be implemented into the modelling chain (Shepherd, 2016), for example adding potential changes in land-use to a high-resolution hydrological model, or changes in hydraulic infrastructure to a hydraulic model for assessing impacts on reservoirs, water-treatment plants, drainage systems, etc.

An important element in the transferability of the method to other catchments is its inherent flexibility, allowing in particular for an active involvement of users. Users can contribute and integrate their empirical knowledge towards the identification of the local-scale meteorological predictors most suitable for their own catchment. Data availability in the models to be downscaled may, however, require choosing parameters that are only approximate indicators of the most suitable ones. For the Wupper catchment studied here, for example, we found daily maximum 700 hPa vertical velocity to perform better than daily maximum 500 hPa horizontal divergence as an indicator of extreme precipitation in the training dataset. The regional model which we wished to downscale, however, had saved vertical velocity at too low a temporal resolution to meaningfully calculate daily

4 Summary and Conclusions

– s.d.t.?

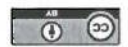

© Author(s) 2017. CC BY 4.0 License.  
Discussion started: 7 December 2017

Hydrol. Earth Syst. Sci. Discuss., <https://doi.org/10.5194/hess-2017-660>  
Manuscript under review for Journal Earth Syst. Sci.

30 *Author contributions.* EM developed the method, performed the analysis and wrote the manuscript. HR and UU contributed ideas and comments on the method, analysis and manuscript.

25 *Code and data availability.* ERA-Interim reanalysis (Dec et al., 2011) are available from the ECMWF (<http://apps.ecmwf.int/datasets/data/interim-full-daily>). RBGNIE precipitation data (Rauhe et al., 2013) are available from the German weather service (DWD, <https://www.dwd.de/DE/leistungen/regnie/regnie.html>). The 0.11° CORDEX data used within this study are distributed within the CORDEX framework by the Earth System Grid Federation (e.g. <https://esgf-data.dkrz.de/projects/esgf-dkrz/>). All remaining simulation data and scripts are available from the corresponding author on request.

known extremal circulation patterns can thus play an important and enduring role in climate modelling. turbulence. Classification algorithms, such as the one presented here, for selective dynamical downscaling preconditioned on still be utilised for downscaling to ever higher resolutions at which even more processes can be explicitly simulated, e.g. counterparts. When global models some day run at convection-permitting resolution as standard, classification algorithms can increases in processor power, regional models will always be able to be run at higher spatial resolutions than their global widespread transferability would be hard to envisage. Irrespective of improvements in statistical downscaling techniques or better account for local fine-scale forcings and incorporate more physical predictors could provide another alternative, though modulate the regional climate change signal (Differnbaugh et al., 2005). Future advances in statistical downscaling techniques to processes along the modelling chain gives additional confidence in the end product, as fine-scale processes can substantially data, focused on extreme rainfall events, for hydrological modelers and decision-makers. The explicit simulation of fine-scale basis (see Introduction), our method represents a computationally inexpensive procedure to produce high-resolution climate Taking into account the limitations of current statistical downscaling techniques stemming from their lacking a physical could even be combined with the aforementioned 'Tales' approach, making a potent tool. reduction in intra-ensemble spread which can be tolerated. Such a region-targeted selection of GCMs (Marun et al., 2017) rejected in favour of the top *N* best-performing models, with *N* a function of both available computing resources and the observed PFD climatology could be considered to poorly represent the regional extremal circulation patterns and thus be dynamically downscaling an entire multi-model ensemble. GCMs whose historical runs fail to satisfactorily reproduce the models from multi-model ensembles (e.g. CMIP) to downscale over a given region, avoiding the computational expense of A further means through which our methodology can be used to limit computational expense is in the selection of individual identification of PFDs can be either raised or lowered based on available computational resources. of the user. With the caveat that excessively high thresholds will result in more undesirably-rejected days, thresholds for the avoiding an unacceptable increase in computational expense. The method is additionally adaptable to the computing capacity maxima. Adoption of horizontal divergence was thus necessitated, allowing the PFDs to still be appropriately classified while

No  
Not expected to

*Acknowledgements.* This study was funded by the European Commission through the H2020 project BINGO (<http://www.projectbingo.eu/>). Grant Agreement 641739. Simulations were carried out at the North-German Supercomputing Alliance (HLRN) and the German Climate Computing Centre (DKRZ). We thank the German weather service (DWD) for producing and making available the REGNIE precipitation dataset. We thank the EU COST Action 733 for producing and making available the clustering software (<http://cost733.geo.uni-augsburg.de>). Analyses and plotting were performed with NCL (Version 6.4.0, doi:10.5065/D6WD3XHS) and R. We thank M. Göber, K.A. Kpogo-Nuwklo, T. Pardowitz, C. Vagenas and C. Volosinuk for helpful discussions.

*Competing interests.* The authors declare that they have no competing interests.

Hydrol. Earth Syst. Sci. Discuss., <https://doi.org/10.5194/hess-2017-660>  
 Manuscript under review for journal Hydrol. Earth Syst. Sci.  
 Discussion started: 7 December 2017  
 © Author(s) 2017. CC BY 4.0 License.

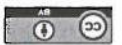

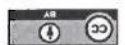

## References

- Ban, N., Schmidt, J., and Schär, C.: Evaluation of the convection-resolving regional climate modeling approach in decade-long simulations, *J. Geophys. Res.-Atmos.*, 119, 7889–7907, 2014.
- Bardossy, A.: Atmospheric circulation pattern classification for South-West Germany using hydrological variables, *Physics and Chemistry of the Earth, Parts A/B/C*, 35, 498–506, 2010.
- Barnes, E. A. and Polvani, L.: Response of the midlatitude jets, and of their variability, to increased greenhouse gases in the CMIP5 models, *J. Climate*, 26, 7117–7135, 2013.
- Bevaqua, E., Marau, D., Haft, T. H., Widmann, M., and Vrac, M.: Multivariate statistical modelling of compound events via pair-copula constructions: analysis of floods in Ravenna (Italy), *Hydrol. Earth Syst. Sci.*, 21, 2701, 2017.
- 10 Boberg, F., Berg, P., Thejll, P., Gutowski, W. J., and Christensen, J. H.: Improved confidence in climate change projections of precipitation evaluated using daily statistics from the PRUDENCE ensemble, *Clim. Dynam.*, 32, 1097–1106, 2009.
- Brigode, P., Bernardara, P., Gallhard, J., Garavaglia, F., Ribstein, P., and Merz, R.: Optimization of the geopotential heights information used in a rainfall-based weather patterns classification over Austria, *Int. J. Climatol.*, 33, 1563–1573, 2013.
- Brissson, E., Demuzere, M., and van Lipzig, N. P.: Modelling strategies for performing convection-permitting climate simulations, *Meteorol. Z.*, 25, 149–163, 2016a.
- 15 Brissson, E., Van Weverberg, K., Demuzere, M., Devis, A., Saeed, S., Stengel, M., and van Lipzig, N. P.: How well can a convection-permitting climate model reproduce decadal statistics of precipitation, temperature and cloud characteristics?, *Clim. Dynam.*, 47, 3043–3061, 2016b.
- Christensen, O., Gaertner, M., Prego, J., and Polcher, J.: Internal variability of regional climate models, *Clim. Dynam.*, 17, 875–887, 2001.
- Dec, D. P., Uppala, S. M., Simmons, A. I., Berrisford, P., Poli, P., Kobayashi, S., Andrae, U., Balmaseda, M. A., Balsamo, G., Bauer, P., Bechtold, P., Beljaars, A. C. M., van de Berg, L., Bidlot, J., Bormann, N., Delsol, C., Dragani, R., Fuentes, M., Geer, A. J., Haimberger, L., Healy, S. B., Hersbach, H., Hölm, E. V., Isaksen, I., Kallberg, P., Köhler, M., Matricardi, M., McNally, A. P., Monge-Sanz, B. M., Morcrette, J.-J., Park, B.-K., Peubey, C., de Rosnay, P., Tavolato, C., Thepaut, J.-N., and Vitart, F.: The ERA-Interim reanalysis: configuration and performance of the data assimilation system, *Q. J. R. Meteor. Soc.*, 137, 553–597, <https://doi.org/10.1002/qj.828>, 2011.
- Denis, B., Laprise, R., and Caya, D.: Sensitivity of a regional climate model to the resolution of the lateral boundary conditions, *Clim. Dynam.*, 20, 107–126, 2003.
- 25 Di Luca, A., de Elia, R., and Laprise, R.: Potential for added value in precipitation simulated by high-resolution nested regional climate models and observations, *Clim. Dynam.*, 38, 1229–1247, 2012.
- Diffenbaugh, N. S., Pal, J. S., Trapp, R. J., and Giorgi, F.: Fine-scale processes regulate the response of extreme events to global climate change, *P. Natl. Acad. Sci. USA*, 102, 15 774–15 778, 2005.
- 30 Feser, F., Roca, B., von Storch, H., Winterfeldt, J., and Zahn, M.: Regional climate models add value to global model data: a review and selected examples, *B. Am. Meteorol. Soc.*, 92, 1181–1192, 2011.
- Fosser, G., Khodayar, S., and Berg, P.: Benefit of convection permitting climate model simulations in the representation of convective precipitation, *Clim. Dynam.*, 44, 45–60, 2015.
- Giannakaki, P. and Martius, O.: Synoptic-scale flow structures associated with extreme precipitation events in northern Switzerland, *Int. J. Climatol.*, 36, 2497–2515, 2016.
- 35 Giorgi, F. and Bi, X.: A study of internal variability of a regional climate model, *J. Geophys. Res.-Atmos.*, 105, 29 503–29 521, 2000.

- Hazeleger, W., Van den Hurk, B., Min, E., Van Oldenborgh, G., Petersen, A., Stainforth, D., Vassiliadou, E., and Smith, L.: Tales of future weather, *Nat. Clim. Change*, 5, 107–113, 2015.
- Heikkilä, U., Sandvik, A., and Sorteberg, A.: Dynamical downscaling of ERA-40 in complex terrain using the WRF regional climate model, *Clim. Dyn.*, 37, 1551–1564, 2011.
- Hidalgo-Muñoz, J., Argüeso, D., Gámiz-Fortis, S., Esteban-Parra, M., and Castro-Díez, Y.: Trends of extreme precipitation and associated synoptic patterns over the southern Iberian Peninsula, *J. Hydrol.*, 409, 497–511, 2011.
- Hohegger, C., Brockhaus, P., and Schaer, C.: Towards climate simulations at cloud-resolving scales, *Meteorol. Z.*, 17, 383–394, 2008.
- Hurrell, J. W.: Decadal trends in the North Atlantic Oscillation: regional temperatures and precipitation, *Science*, 269, 676–678, 1995.
- Jacob, D., Petersen, J., Eggert, B., Alias, A., Christensen, O. B., Bouwer, L. M., Braun, A., Colette, A., Déqué, M., Georgievski, G., Georgopoulou, E., Gobler, A., Henschler, A., Hempelmann, N., Jones, C., Keuler, K., Kovari, S., Kröner, N., Kodarski, S., Kringsmann, A., Martin, E., van Meijgaard, E., Moseley, C., Pfeifer, S., Preusschmann, S., Radermacher, C., Radke, K., Reched, D., Rounsevell, M., Samuëlsson, P., Somot, S., Soussana, J.-F., Teichmann, C., Valentini, R., Vautard, R., Weber, B., and Yiu, P.: EURO-CORDEX: new high-resolution climate change projections for European impact research, *Reg. Environ. Change*, 14, 563–578, <https://doi.org/10.1007/s10113-013-0499-2>, 2014.
- Kendon, E. J., Roberts, N. M., Senior, C. A., and Roberts, M. J.: Realism of rainfall in a very high-resolution regional climate model, *J. Climate*, 25, 5791–5806, 2012.
- Kendon, E. J., Roberts, N. M., Fowler, H. J., Roberts, M. J., Chan, S. C., and Senior, C. A.: Heavier summer downpours with climate change revealed by weather forecast resolution model, *Nat. Clim. Change*, 4, 570–576, 2014.
- Keuler, K., Radke, K., Kodarski, S., and Lüthi, D.: Regional climate change over Europe in COSMO-CLM: Influence of emission scenario and driving global model, *Meteorol. Z.*, pp. 121–136, 2016.
- Kodarski, S., Keuler, K., Christensen, O. B., Colette, A., Déqué, M., Gobler, A., Goergen, K., Jacob, D., Lüthi, D., van Meijgaard, E., Nikulin, G., Schär, C., Teichmann, C., Vautard, R., Warrach-Sagi, K., and Wulfmeyer, V.: Regional climate modeling on European scales: a joint standard evaluation of the EURO-CORDEX RCM ensemble, *Geosci. Model Dev.*, 7, 1297–1333, 2014.
- Lean, H. W., Clark, P. A., Dixon, M., Roberts, N. M., Fitch, A., Forbes, R., and Halliwell, C.: Characteristics of high-resolution versions of the Met Office Unified Model for forecasting convection over the United Kingdom, *Mon. Weather Rev.*, 136, 3408–3424, 2008.
- Lucas-Picher, P., Caya, D., de Elia, R., and Laprise, R.: Investigation of regional climate models' internal variability with a ten-member ensemble of 10-year simulations over a large domain, *Clim. Dynam.*, 31, 927–940, 2008.
- Marau, D.: Bias correcting climate change simulations—a critical review, *Curr. Clim. Change Rep.*, 2, 211–220, 2016.
- Marau, D., Wetterhall, F., Ireson, A. M., Chandler, R. E., Kendon, E. J., Widmann, M., Brienen, S., Rust, H. W., Sauter, T., Thiembl, M., Venema, V. K. C., Chun, K. P., Goodess, C. M., Jones, R. G., Onof, C., Vrac, M., and Thiéle-Eich, I.: Precipitation downscaling under climate change: Recent developments to bridge the gap between dynamical models and the end user, *Rev. Geophys.*, 48, RG3003, <https://doi.org/10.1029/2009RG000314>, 2010.
- Marau, D., Shepherd, T. G., Widmann, M., Zappa, G., Walton, D., Gutierrez, J. M., Hagemann, S., Richter, I., Soares, P. M. M., Hall, A., and Mearns, L. O.: Towards process-informed bias correction of climate change simulations, *Nat. Clim. Change*, 7, 764–773, <https://doi.org/10.1038/nclimate3418>, 2017.
- Masato, G., Hoskins, B. J., and Woollings, T.: Winter and summer Northern Hemisphere blocking in CMIP5 models, *J. Climate*, 26, 7044–7059, 2013.
- Matsueda, M.: Predictability of Euro-Russian blocking in summer of 2010, *Geophys. Res. Lett.*, 38, 2011.

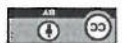

- Meredith, E. P., Maraua, D., Semenov, V. A., and Park, W.: Evidence for added value of convection-permitting models for studying changes in extreme precipitation, *J. Geophys. Res.-Atmos.*, 120, 12500–12513, 2015.
- Metno, A., Fernández-Vaquero, M., López, L., Fernández-González, S., Hermida, L., Sánchez, J. L., García-Ortega, E., and Gascón, E.: Large-scale patterns of daily precipitation extremes on the Iberian Peninsula, *Int. J. Climatol.*, 36, 3873–3891, 2016.
- 5 Pall, P., Patricola, C. M., Wehner, M. F., Stone, D. A., Paolino, C. J., and Collins, W. D.: Diagnosing conditional anthropogenic contributions to heavy Colorado rainfall in September 2013, *Weather and Climate Extremes*, 17, 1–6, 2017.
- Phillipp, A., Della-Marta, P.-M., Jacobet, J., Fereday, D. R., Jones, R. D., Moberg, A., and Wanner, H.: Long-term variability of daily North Atlantic-European pressure patterns since 1850 classified by simulated annealing clustering, *J. Climate*, 20, 4065–4095, 2007.
- Phillipp, A., Beck, C., Huth, R., and Jacobet, J.: Development and comparison of circulation type classifications using the COST 733 dataset and software, *Int. J. Climatol.*, 36, 2673–2691, 2016.
- 10 Prein, A., Gobiet, A., Suklitsch, M., Truhetz, H., Awan, N., Keuler, K., and Georgievski, G.: Added value of convection permitting seasonal simulations, *Clim. Dyn.*, 41, 2655–2677, 2013.
- Prein, A. F., Langhans, W., Fosser, G., Ferrone, A., Ban, N., Goergen, K., Keller, M., Tölle, M., Gijbahr, O., Feser, F., Brisson, E., Kollet, S., Schmidli, J., van Lipzig, N. P., and Leung, R.: A review on regional convection-permitting climate modeling: Demonstrations, prospects, and challenges, *Rev. Geophys.*, 53, 323–361, 2015.
- 15 Rauthe, M., Steiner, H., Riediger, U., Mazurkiewicz, A., and Gratzki, A.: A Central European precipitation climatology—Part I: Generation and validation of a high-resolution gridded daily data set (HYRAS), *Meteorol. Z.*, 22, 235–256, 2013.
- Roberts, N.: Assessing the spatial and temporal variation in the skill of precipitation forecasts from an NWP model, *Meteorol. App.*, 15, 163–169, 2008.
- 20 Rockett, B., Will, A., and Hense, A.: The regional climate model COSMO-CLM (CCLM), *Meteorol. Z.*, 17, 347–348, 2008.
- Romero, R., Sumner, G., Ramis, C., and Gonçalves, A.: A classification of the atmospheric circulation patterns producing significant daily rainfall in the Spanish Mediterranean area, *Int. J. Climatol.*, 19, 765–785, 1999.
- Rust, H. W., Vrac, M., Lengaigne, M., and Sultan, B.: Quantifying differences in circulation patterns based on probabilistic models: IPCC AR4 multimodel comparison for the North Atlantic, *J. Climate*, 23, 6573–6589, 2010.
- 25 Rust, H. W., Vrac, M., Sultan, B., and Lengaigne, M.: Mapping weather-type influence on senegal precipitation based on a spatial-temporal statistical model, *J. Climate*, 26, 8189–8209, 2013.
- Schar, C., Ban, N., Fischer, E. M., Rajczak, J., Schmidt, J., Frei, C., Giorgi, F., Karl, T. R., Kendon, E. J., Tank, A. M. K., O’Gorman, P. A., Sillmann, J., Zhang, X., and Zwiers, F. W.: Percentile indices for assessing changes in heavy precipitation events, *Climatic Change*, 137, 201–216, 2016.
- 30 Shepherd, T. G.: Atmospheric circulation as a source of uncertainty in climate change projections, *Nat. Geosci.*, 7, 703–708, 2014.
- Shepherd, T. G.: A common framework for approaches to extreme event attribution, *Curr. Clim. Change Rep.*, 2, 28–38, 2016.
- Sun, J., Tier, S. B., Xiao, Q., Weisman, M. L., Wang, H., Ying, Z., Xu, M., and Zhang, Y.: Sensitivity of 0–12-h warm-season precipitation forecasts over the central United States to model initialization, *Weather Forecast.*, 27, 832–855, 2012.
- Taylor, K. E., Stouffer, R. J., and Meehl, G. A.: An overview of CMIP5 and the experiment design, *B. Am. Meteorol. Soc.*, 93, 485, 2012.
- 35 Torma, C., Giorgi, F., and Coppola, E.: Added value of regional climate modeling over areas characterized by complex terrain—Precipitation over the Alps, *J. Geophys. Res.-Atmos.*, 120, 3957–3972, 2014. DOI:10.1029/2014JD022781, 2015.
- Trenberth, K. E., Fasullo, J. T., and Shepherd, T. G.: Attribution of climate extreme events, *Nat. Clim. Change*, 5, 725–730, 2015.

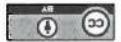

- Van Vuuren, D. P., Edmonds, J., Kainuma, M., Riahi, K., Thomson, A., Hibbard, K., Hurtt, G. C., Kram, T., Krey, V., Lamarque, J.-F., Masui, T., Meinshausen, M., Nakicenovic, N., Smith, S. J., and Rose, S. K.: The representative concentration pathways: an overview, *Climatic Change*, 109, 5, 2011.
- Volosjuk, C., Maraun, D., Semenov, V. A., and Park, W.: Extreme precipitation in an atmosphere general circulation model: impact of horizontal and vertical model resolutions, *J. Climate*, 28, 1184–1205, 2015.
- Volosjuk, C., Maraun, D., Vrac, M., and Widmann, M.: A combined statistical bias correction and stochastic downscaling method for precipitation, *Hydrol. Earth Syst. Sci.*, 21, 1693–1719, <https://doi.org/10.5194/hess-21-1693-2017>, 2017.
- Weisman, M. L., Davis, C., Wang, W., Manning, K. W., and Klemp, J. B.: Experiences with 0–36-h explicit convective forecasts with the WRF-ARW model, *Weather Forecast.*, 23, 407–437, 2008.
- 10 Zappa, G., Shaffrey, L. C., Hodges, K. I., Sansom, R. G., and Stephenson, D. B.: A multimodel assessment of future projections of North Atlantic and European extratropical cyclones in the CMIP5 climate models, *J. Climate*, 26, 5846–5862, 2013.
